# Supplementary material for: Astrocytic but not Microglial Antigen Presentation Shapes Protective Immunity to Toxoplasma gondii in the Brain
Source: Research Square preprint supplement (doi:10.21203/rs.3.rs-9544619/v1), 2026-05-11
Supplement: Supplementary file 1 [file 27e33f9735c0449cf1bca7c0.docx]

**Supplemental Figures:**

**Supplementary Figure 1: Analysis of immune cell MHCI and MHCII antigen presentation during *T. gondii* infection. A)** Representative flow cytometry gating for identification of ZsGreen+CD45intCD11b+ microglia population. **B)** Representative flow plots of naïve and infected brain MHCI+ population. MHCI+ population was gated using FMO. **C)** Within the MHCI+ population, immune populations were then gated into to determine the makeup of this MHCI+ population. B cells (B220+), NK cells (NK1.1+), Ly6Chi (CD11b+CD46hiLy6g-Ly6Chi), Ly6clow (CD11b+CD46hiLy6g-Ly6Clow), T cells (TCRβ+), CD4+ T cells (TCRβ+CD4+), CD8+ T cells (TCRβ+CD8+). **D)** Representative flow plots of naïve and infected brain MHCII+ population. **E)** Within the MHCII+ population, immune populations were then gated to determine the makeup of this MHCII+ population. In C and E n=4 mice, one experiment. Data are presented as mean ± s.e.m.

**Supplementary Figure 2: Representative flow gating for immune cell populations in the infected brain. A)** Representative gating scheme for immune cell populations. **B)** To subset microglia, the CD45+ population was then gated for CD45intCD11b+ZsGreen+ populations. **C)** To gate for inflammatory monocytes, within the CD45+ population we gated for CD45hiCD11b+Ly6g-Ly6Chi and then examined iNOS+ expression. **D)** To examine T cell populations, TCRβ+ cells were identified and then sub-gated into CD4+ and CD8+ cells.

**Supplementary Figure 3: CNS-macrophage MHCI deletion does not alter overall immune responses in the brain. A)** Flow cytometric analysis of CD45intCD11b+ZsGreen+ microglia for MHCII expression at 6wpi. Cell counts enumerated for total **B)** TCRβ+ of live **C)** TCRβ+CD8+ and **D)** TCRβ+CD4+ cells in the brains of MGWT and MGB2m mice. **E)** Frequency and **F)** total number of TCRβ+CD8+TNFα+ cells measured by flow cytometry in the brain. **G)** RT-qPCR of total Tnfin whole brain homogenate. Flow cytometric analysis of IFNγ production by TCRβ+CD4+ cells by **H)** frequency of and **I)** number in the brains of MGWT and MGB2m mice. **J)** Frequency and **K)** total number of TCRβ+CD4+TNFα+ T cells measured by flow cytometry in the brain. Statistical significance was determined via randomized block ANOVA compiled from 3-4 experiments with n=10-12 mice/group (**A**), n=15 mice/group **(B-D, G),** and n=9-12 mice/group **(E-F, H-K).** Data are presented as mean ± s.e.m; *P < 0.05, **P < 0.01, ns; not significant.

**Supplementary Figure 4: CNS-macrophage MHCII deletion does not alter overall immune responses in the brain. A)** Flow cytometric analysis of CD45intCD11b+ZsGreen+ microglia for MHCI expression at 4wpi. Cell counts enumerated for total **B)** TCRβ+ of live **C)** TCRβ+CD4+ and **D)** TCRβ+ CD8+ cells in the brains of MGWT and MGMHCII mice. **E)** Frequency and **F)** total number of TCRβ+CD4+TNFα+ cells measured by flow cytometry in the brain. **G)** RT-qPCR of total Tnfin whole brain homogenate. Flow cytometric analysis of IFNγ production by TCRβ+ CD8+ cells by **H)** frequency of and **I)** number of TCRβ+CD8+IFNγ+ cells in the brains of MGWT and MGMHCII mice. **J)** Frequency and **K)** total number of TCRβ+CD8+TNFα+ T cells measured by flow cytometry in the brain. Statistical significance was determined via randomized block ANOVA compiled from 3-4 experiments with n=9-10 mice/group (**A-B**) and n=13-16 mice/group **(C-K).** Data are presented as mean ± s.e.m; ***P < 0.001, ns; not significant.

**Supplementary Figure 5: Gating strategy for astrocytes and myeloid populations and assessment of MHCI expression.** Flow cytometry used to isolate astrocytes from brain single-cell suspensions. **A)** Cells were sequentially gated on singlets, live cells, CD45⁻CD31⁻ populations, and GLAST⁺. **B)** Gating strategy for CNS myeloid populations pre-gated on singlets, live cells, and CD45⁺ cells (as shown in **Fig S2**), followed by identification of CD45hiCD11b⁺ infiltrating myeloid cells and CD45intCD11b⁺ microglia for assessment of MHCI expression. **C)** Representative histograms showing MHCI expression on CD45hiCD11b⁺ cells and **D)** quantification of MHCI+ cells. **E)** Representative histogram of MHCI expression on CD45intCD11b⁺ cells and **F)** quantification of MHCI+ cells. FMO controls for histograms are shown in blue **(D, F).** Statistical significance determined using unpaired t-test with n=3-4 mice/group. Data presented as mean ± s.e.m.; ns; not significant.

**Supplementary Figure 6: No deficit in TCRβ+CD8+ T cell cytokine or granzyme-B production when astrocytes lack MHCI. A, C)** Flow cytometry analysis of frequency and **B, D)** total number of CD8⁺TNFα⁺ and CD4⁺TNFα⁺ T cells, respectively, from brains of mice following *ex vivo* plating and brefeldin A treatment. **(E–H)** Frequency of CD8⁺IFNγ⁺, CD8⁺TNFα⁺, CD4⁺ IFNγ⁺, and CD4⁺TNFα⁺ T cells following *ex vivo* plating and stimulation with PMA and ionomycin. **I)** Frequency, **J)** total number, and **K)** mean fluorescence intensity (MFI) of granzyme B (GrzmB) expression in CD8⁺ T cells following stimulation with PMA/ionomycin. **(L)** RT-qPCR analysis of Grzmb expression in whole brain homogenate. Statistical significance was determined via randomized block ANOVA compiled from 4 experiments with n=16-19 mice/group (**A-H, L**). Statistical significance determined using unpaired t-test with n=3 mice/group (**I-K**). Data are represented as mean ± s.e.m. *P< 0.05, ****P** < 0.01; ns, not significant.

**Supplementary Figure 7: Brain and spleen populations in mice lacking astrocyte MHCI. A)** Frequency and **B)** total number of CD11b⁺CD45hi infiltrating myeloid cells in the brain at 6wpi. **C)** Frequency and **D)** total number of Foxp3⁺ regulatory CD4⁺ T cells in the brain. **E)** Representative flow cytometry strategy used to identify splenic T cell populations, gated on singlets, live cells, TCRβ⁺ T cells, and CD4⁺ and CD8⁺ subsets. **F)** Total numbers of splenic TCRβ⁺ T cells, TCRβ⁺ CD4⁺ T cells, TCRβ⁺ CD8⁺ T cells, and CD4⁺ Ki67⁺ and CD8⁺ Ki67⁺ T cells at 6 wpi. Statistical significance was determined via randomized block ANOVA compiled from 3-4 experiments, with n=16-19 mice/group (**A-B, F**), n=13 mice/group **(C-D)**. data are represented as mean ± s.e.m. **P** < 0.01; ns, not significant
